# Supplementary material
Source: publisher figshare collection journal article supplement (https://acs.figshare.com/ndownloader/files/4675027)
Supplement: Supplementary file 1 [file 4675027]

 
data_perep3 
 
_audit_creation_method            SHELXL-97 
_chemical_name_systematic 
; 
 ? 
; 
_chemical_name_common             ? 
_chemical_melting_point           ? 
_chemical_formula_moiety          'C6 H14 O, C9 H6 O6' 
_chemical_formula_sum 
 'C15 H20 O7' 
_chemical_formula_weight          312.31 
_chemical_compound_source         'Synthesized by the authors. See text'

loop_ 
 _atom_type_symbol 
 _atom_type_description 
 _atom_type_scat_dispersion_real 
 _atom_type_scat_dispersion_imag 
 _atom_type_scat_source 
 'C'  'C'   0.0181   0.0091 
 'International Tables Vol C Tables 4.2.6.8 and 6.1.1.4' 
 'H'  'H'   0.0000   0.0000 
 'International Tables Vol C Tables 4.2.6.8 and 6.1.1.4' 
 'O'  'O'   0.0492   0.0322 
 'International Tables Vol C Tables 4.2.6.8 and 6.1.1.4' 
 
_symmetry_cell_setting            Triclinic
_symmetry_space_group_name_H-M    P-1
_symmetry_space_group_name_hall   '-P 1'
 
loop_ 
 _symmetry_equiv_pos_as_xyz 
 'x, y, z' 
 '-x, -y, -z' 
 
_cell_length_a                    8.2763(4) 
_cell_length_b                    8.6205(4) 
_cell_length_c                    11.9930(5) 
_cell_angle_alpha                 104.199(3) 
_cell_angle_beta                  93.133(2) 
_cell_angle_gamma                 110.892(2) 
_cell_volume                      765.37(6) 
_cell_formula_units_Z             2 
_cell_measurement_temperature     220(2)
_cell_measurement_reflns_used     5525
_cell_measurement_theta_min        3.85
_cell_measurement_theta_max       71.92
 
_exptl_crystal_description        plate
_exptl_crystal_colour             Colorless
_exptl_crystal_size_max           0.32
_exptl_crystal_size_mid           0.16
_exptl_crystal_size_min           0.05
_exptl_crystal_density_meas          ?
_exptl_crystal_density_diffrn     1.355 
_exptl_crystal_density_method     'not measured' 
_exptl_crystal_F_000              332 
_exptl_absorpt_coefficient_mu     0.912 
_exptl_absorpt_correction_Type    multi-scan
_exptl_absorpt_correction_T_min   0.7590 
_exptl_absorpt_correction_T_max   0.9558 
_exptl_absorpt_process_details    'Sadabs (Sheldrick,1996)'
 
 
_diffrn_ambient_temperature       220(2)
_diffrn_radiation_wavelength      1.54178 
_diffrn_radiation_type            CuK\a 
_diffrn_radiation_source          'Rotating Anode'
_diffrn_radiation_monochromator   'Montel 200 optics'
_diffrn_measurement_device_type   'Bruker Smart 6000'
_diffrn_measurement_method        '\w'
_diffrn_detector_area_resol_mean   5.5
_diffrn_standards_number          5
_diffrn_standards_interval_count  ? 
_diffrn_standards_interval_time   ? 
_diffrn_standards_decay_%           0.00
_diffrn_reflns_number             19516
_diffrn_reflns_av_R_equivalents   0.071
_diffrn_reflns_av_sigmaI/netI     0.0519 
_diffrn_reflns_limit_h_min        -10
_diffrn_reflns_limit_h_max        10
_diffrn_reflns_limit_k_min        -10
_diffrn_reflns_limit_k_max        10
_diffrn_reflns_limit_l_min        0
_diffrn_reflns_limit_l_max        14
_diffrn_reflns_theta_min          3.85 
_diffrn_reflns_theta_max          72.58 
_reflns_number_total              2913
_reflns_number_gt                 2280
_reflns_threshold_expression      'I>2\s(I)'
 
_computing_data_collection        'SMART (Bruker, 2003)'
_computing_cell_refinement        'SMART (Bruker, 2003)'
_computing_data_reduction         'SAINT (Bruker, 2004)'
_computing_structure_solution     'SHELXS97 (Sheldrick, 1997)'
_computing_structure_refinement   'SHELXL97 (Sheldrick, 1997)'
_computing_molecular_graphics     'SHELXTL (Bruker, 1997)'
_computing_publication_material   'UdMX (local program)'
 
_refine_special_details 
; 
 Refinement of F^2^ against ALL reflections.  The weighted R-factor wR and 
 goodness of fit S are based on F^2^, conventional R-factors R are based 
 on F, with F set to zero for negative F^2^. The threshold expression of 
 F^2^ > 2sigma(F^2^) is used only for calculating R-factors(gt) etc. and is 
 not relevant to the choice of reflections for refinement.  R-factors based 
 on F^2^ are statistically about twice as large as those based on F, and R- 
 factors based on ALL data will be even larger. 
; 
 
_refine_ls_structure_factor_coef  Fsqd  
_refine_ls_matrix_type            full 
_refine_ls_weighting_scheme       calc  
_refine_ls_weighting_details 
 'calc w=1/[\s^2^(Fo^2^)+(0.0955P)^2^+0.1058P] where P=(Fo^2^+2Fc^2^)/3' 
_atom_sites_solution_primary      direct 
_atom_sites_solution_secondary    difmap 
_atom_sites_solution_hydrogens    geom 
_refine_ls_hydrogen_treatment     mixed
_refine_ls_extinction_method      SHELXL 
_refine_ls_extinction_coef        0.0066(14) 
_refine_ls_extinction_expression 
 'Fc^*^=kFc[1+0.001xFc^2^\l^3^/sin(2\q)]^-1/4^' 
_refine_ls_number_reflns          2913 
_refine_ls_number_parameters      217 
_refine_ls_number_restraints      6 
_refine_ls_R_factor_all           0.0662 
_refine_ls_R_factor_gt            0.0548 
_refine_ls_wR_factor_ref          0.1565 
_refine_ls_wR_factor_gt           0.1470 
_refine_ls_goodness_of_fit_ref    1.038 
_refine_ls_restrained_S_all       1.038 
_refine_ls_shift/su_max           0.002 
_refine_ls_shift/su_mean          0.000 
 
loop_ 
 _atom_site_label 
 _atom_site_type_symbol 
 _atom_site_fract_x 
 _atom_site_fract_y 
 _atom_site_fract_z 
 _atom_site_U_iso_or_equiv 
 _atom_site_adp_type 
 _atom_site_occupancy 
 _atom_site_symmetry_multiplicity 
 _atom_site_calc_flag 
 _atom_site_refinement_flags 
 _atom_site_disorder_assembly 
 _atom_site_disorder_group 
O71 O -0.03740(18) 0.71626(17) 0.46701(12) 0.0385(4) Uani 1 1 d . . . 
O72 O 0.18520(17) 0.86385(16) 0.61354(11) 0.0346(4) Uani 1 1 d D . . 
H72 H 0.112(4) 0.780(4) 0.651(3) 0.096(11) Uiso 1 1 d D . . 
O81 O 0.68167(17) 1.37858(16) 0.57526(11) 0.0352(4) Uani 1 1 d . . . 
O82 O 0.65927(18) 1.45627(17) 0.41185(12) 0.0383(4) Uani 1 1 d D . . 
H82 H 0.778(3) 1.550(4) 0.447(3) 0.071(9) Uiso 1 1 d D . . 
O91 O 0.18166(18) 1.12975(19) 0.09535(12) 0.0405(4) Uani 1 1 d . . . 
O92 O -0.04471(19) 0.90582(19) 0.11537(13) 0.0439(4) Uani 1 1 d D . . 
H92 H -0.098(5) 0.890(5) 0.031(3) 0.118(14) Uiso 1 1 d D . . 
C1 C 0.1928(2) 0.9597(2) 0.44452(15) 0.0242(4) Uani 1 1 d . . . 
C2 C 0.3535(2) 1.0962(2) 0.49234(15) 0.0250(4) Uani 1 1 d . . . 
H2 H 0.4084 1.1109 0.5670 0.030 Uiso 1 1 calc R . . 
C3 C 0.4318(2) 1.2104(2) 0.42854(15) 0.0246(4) Uani 1 1 d . . . 
C4 C 0.3509(2) 1.1891(2) 0.31824(16) 0.0273(4) Uani 1 1 d . . . 
H4 H 0.4042 1.2664 0.2755 0.033 Uiso 1 1 calc R . . 
C5 C 0.1902(2) 1.0526(2) 0.27097(15) 0.0258(4) Uani 1 1 d . . . 
C6 C 0.1118(2) 0.9385(2) 0.33444(16) 0.0264(4) Uani 1 1 d . . . 
H6 H 0.0036 0.8466 0.3026 0.032 Uiso 1 1 calc R . . 
C7 C 0.1027(2) 0.8344(2) 0.50907(16) 0.0264(4) Uani 1 1 d . . . 
C8 C 0.6034(2) 1.3558(2) 0.48057(15) 0.0267(4) Uani 1 1 d . . . 
C9 C 0.1063(2) 1.0308(2) 0.15305(16) 0.0292(4) Uani 1 1 d . . . 
O10 O -0.00763(19) 0.64106(18) 0.70880(12) 0.0417(4) Uani 1 1 d D . . 
H10 H -0.113(4) 0.549(4) 0.660(3) 0.076(9) Uiso 1 1 d D . . 
C11 C 0.0321(3) 0.5876(2) 0.80722(18) 0.0381(5) Uani 1 1 d . . . 
H11A H 0.0376 0.4729 0.7807 0.046 Uiso 1 1 calc R . . 
H11B H -0.0607 0.5795 0.8556 0.046 Uiso 1 1 calc R . . 
C12 C 0.2047(3) 0.7158(3) 0.87795(17) 0.0360(5) Uani 1 1 d . . . 
H12A H 0.2027 0.8323 0.8964 0.043 Uiso 1 1 calc R . . 
H12B H 0.2982 0.7148 0.8314 0.043 Uiso 1 1 calc R . . 
C13 C 0.2452(3) 0.6760(3) 0.99095(17) 0.0358(5) Uani 1 1 d . . . 
H13A H 0.1517 0.6773 1.0375 0.043 Uiso 1 1 calc R . . 
H13B H 0.2467 0.5594 0.9724 0.043 Uiso 1 1 calc R . . 
C14 C 0.4201(3) 0.8050(3) 1.06292(18) 0.0419(5) Uani 1 1 d . . . 
H14A H 0.4197 0.9219 1.0781 0.050 Uiso 1 1 calc R . . 
H14B H 0.5134 0.8004 1.0168 0.050 Uiso 1 1 calc R . . 
C15 C 0.4631(3) 0.7742(3) 1.17924(19) 0.0459(6) Uani 1 1 d . . . 
H15A H 0.5624 0.8763 1.2266 0.055 Uiso 1 1 calc R . . 
H15B H 0.3625 0.7624 1.2207 0.055 Uiso 1 1 calc R . . 
C16 C 0.5072(4) 0.6169(4) 1.1689(2) 0.0586(7) Uani 1 1 d . . . 
H16A H 0.4071 0.5141 1.1263 0.088 Uiso 1 1 calc R . . 
H16B H 0.5365 0.6087 1.2461 0.088 Uiso 1 1 calc R . . 
H16C H 0.6064 0.6267 1.1277 0.088 Uiso 1 1 calc R . . 
 
loop_ 
 _atom_site_aniso_label 
 _atom_site_aniso_U_11 
 _atom_site_aniso_U_22 
 _atom_site_aniso_U_33 
 _atom_site_aniso_U_23 
 _atom_site_aniso_U_13 
 _atom_site_aniso_U_12 
O71 0.0311(7) 0.0365(7) 0.0352(8) 0.0217(6) 0.0004(6) -0.0089(6) 
O72 0.0348(7) 0.0388(7) 0.0237(7) 0.0206(6) 0.0013(5) -0.0007(6) 
O81 0.0302(7) 0.0388(7) 0.0270(7) 0.0175(6) -0.0019(5) -0.0025(6) 
O82 0.0320(7) 0.0381(7) 0.0345(8) 0.0259(6) -0.0014(6) -0.0080(6) 
O91 0.0401(8) 0.0503(8) 0.0253(7) 0.0249(6) 0.0017(6) 0.0017(7) 
O92 0.0381(8) 0.0466(8) 0.0303(8) 0.0200(6) -0.0085(6) -0.0072(6) 
C1 0.0250(9) 0.0250(8) 0.0208(9) 0.0138(7) 0.0056(7) 0.0023(7) 
C2 0.0246(9) 0.0281(8) 0.0202(9) 0.0126(7) 0.0028(7) 0.0038(7) 
C3 0.0226(9) 0.0257(8) 0.0233(9) 0.0133(7) 0.0044(7) 0.0023(7) 
C4 0.0269(9) 0.0289(8) 0.0243(9) 0.0160(7) 0.0044(7) 0.0030(7) 
C5 0.0283(9) 0.0294(8) 0.0183(9) 0.0120(7) 0.0034(7) 0.0057(7) 
C6 0.0242(9) 0.0270(8) 0.0233(9) 0.0124(7) 0.0024(7) 0.0008(7) 
C7 0.0267(9) 0.0277(8) 0.0240(9) 0.0151(7) 0.0061(7) 0.0038(7) 
C8 0.0257(9) 0.0283(8) 0.0239(9) 0.0141(7) 0.0047(7) 0.0032(7) 
C9 0.0292(9) 0.0322(8) 0.0230(9) 0.0149(7) 0.0038(7) 0.0036(7) 
O10 0.0390(8) 0.0441(7) 0.0299(8) 0.0261(6) -0.0028(6) -0.0071(6) 
C11 0.0430(11) 0.0365(9) 0.0296(11) 0.0217(8) -0.0002(8) 0.0018(9) 
C12 0.0362(11) 0.0428(10) 0.0263(10) 0.0208(8) 0.0046(8) 0.0048(9) 
C13 0.0394(11) 0.0413(10) 0.0279(10) 0.0202(8) 0.0066(8) 0.0098(9) 
C14 0.0417(12) 0.0487(11) 0.0311(11) 0.0221(9) 0.0037(9) 0.0056(9) 
C15 0.0526(13) 0.0518(12) 0.0297(11) 0.0192(10) 0.0015(9) 0.0113(10) 
C16 0.0709(17) 0.0746(16) 0.0429(14) 0.0298(13) 0.0085(12) 0.0335(14) 
 
_geom_special_details 
; 
 All esds (except the esd in the dihedral angle between two l.s. planes) 
 are estimated using the full covariance matrix.  The cell esds are taken 
 into account individually in the estimation of esds in distances, angles 
 and torsion angles; correlations between esds in cell parameters are only 
 used when they are defined by crystal symmetry.  An approximate (isotropic) 
 treatment of cell esds is used for estimating esds involving l.s. planes. 
; 
 


loop_                                         
        _geom_bond_atom_site_label_1          
        _geom_bond_atom_site_label_2          
        _geom_bond_site_symmetry_1            
        _geom_bond_site_symmetry_2            
        _geom_bond_distance                   
        _geom_bond_publ_flag                  
O71            C7             .              .                     1.215(2)   Y
O72            C7             .              .                     1.314(2)   Y
O72            H72            .              .                      0.98(3)   ?
O81            C8             .              .                     1.211(2)   Y
O82            C8             .              .                     1.323(2)   Y
O82            H82            .              .                      1.01(3)   ?
O91            C9             .              .                     1.246(2)   Y
O92            C9             .              .                     1.291(2)   Y
O92            H92            .              .                      1.04(3)   ?
C1             C6             .              .                     1.387(2)   Y
C1             C2             .              .                     1.397(2)   Y
C1             C7             .              .                     1.491(2)   Y
C2             C3             .              .                     1.394(2)   Y
C2             H2             .              .                         0.94   ?
C3             C4             .              .                     1.389(2)   Y
C3             C8             .              .                     1.493(2)   Y
C4             C5             .              .                     1.396(2)   Y
C4             H4             .              .                         0.94   ?
C5             C6             .              .                     1.391(2)   Y
C5             C9             .              .                     1.479(2)   Y
C6             H6             .              .                         0.94   ?
O10            C11            .              .                     1.430(2)   Y
O10            H10            .              .                      0.98(3)   ?
C11            C12            .              .                     1.505(3)   Y
C11            H11a           .              .                         0.98   ?
C11            H11b           .              .                         0.98   ?
C12            C13            .              .                     1.525(2)   Y
C12            H12a           .              .                         0.98   ?
C12            H12b           .              .                         0.98   ?
C13            C14            .              .                     1.524(3)   Y
C13            H13a           .              .                         0.98   ?
C13            H13b           .              .                         0.98   ?
C14            C15            .              .                     1.529(3)   Y
C14            H14a           .              .                         0.98   ?
C14            H14b           .              .                         0.98   ?
C15            C16            .              .                     1.504(3)   Y
C15            H15a           .              .                         0.98   ?
C15            H15b           .              .                         0.98   ?
C16            H16a           .              .                         0.97   ?
C16            H16b           .              .                         0.97   ?
C16            H16c           .              .                         0.97   ?

loop_                                         
        _geom_angle_atom_site_label_1         
        _geom_angle_atom_site_label_2         
        _geom_angle_atom_site_label_3         
        _geom_angle_site_symmetry_1           
        _geom_angle_site_symmetry_2           
        _geom_angle_site_symmetry_3           
        _geom_angle                           
        _geom_angle_publ_flag                 
C7        O72       H72       .         .         .             108(2)        ?
C8        O82       H82       .         .         .          110.9(18)        ?
C9        O92       H92       .         .         .             115(2)        ?
C6        C1        C2        .         .         .         120.14(15)        Y
C6        C1        C7        .         .         .         118.04(15)        Y
C2        C1        C7        .         .         .         121.82(16)        Y
C3        C2        C1        .         .         .         119.53(16)        Y
C3        C2        H2        .         .         .              120.2        ?
C1        C2        H2        .         .         .              120.2        ?
C4        C3        C2        .         .         .         120.39(15)        Y
C4        C3        C8        .         .         .         120.55(15)        Y
C2        C3        C8        .         .         .         119.06(16)        Y
C3        C4        C5        .         .         .         119.82(16)        Y
C3        C4        H4        .         .         .              120.1        ?
C5        C4        H4        .         .         .              120.1        ?
C6        C5        C4        .         .         .         119.90(16)        Y
C6        C5        C9        .         .         .         120.88(15)        Y
C4        C5        C9        .         .         .         119.21(15)        Y
C1        C6        C5        .         .         .         120.22(15)        Y
C1        C6        H6        .         .         .              119.9        ?
C5        C6        H6        .         .         .              119.9        ?
O71       C7        O72       .         .         .         123.73(16)        Y
O71       C7        C1        .         .         .         121.43(16)        Y
O72       C7        C1        .         .         .         114.83(14)        Y
O81       C8        O82       .         .         .         124.18(15)        Y
O81       C8        C3        .         .         .         123.44(15)        Y
O82       C8        C3        .         .         .         112.38(15)        Y
O91       C9        O92       .         .         .         123.43(17)        Y
O91       C9        C5        .         .         .         120.10(15)        Y
O92       C9        C5        .         .         .         116.49(15)        Y
C11       O10       H10       .         .         .             108(2)        ?
O10       C11       C12       .         .         .         109.98(15)        Y
O10       C11       H11A      .         .         .              109.7        ?
C12       C11       H11A      .         .         .              109.7        ?
O10       C11       H11B      .         .         .              109.7        ?
C12       C11       H11B      .         .         .              109.7        ?
H11A      C11       H11B      .         .         .              108.2        ?
C11       C12       C13       .         .         .         112.39(15)        Y
C11       C12       H12A      .         .         .              109.1        ?
C13       C12       H12A      .         .         .              109.1        ?
C11       C12       H12B      .         .         .              109.1        ?
C13       C12       H12B      .         .         .              109.1        ?
H12A      C12       H12B      .         .         .              107.9        ?
C14       C13       C12       .         .         .         112.70(16)        Y
C14       C13       H13A      .         .         .              109.1        ?
C12       C13       H13A      .         .         .              109.1        ?
C14       C13       H13B      .         .         .              109.1        ?
C12       C13       H13B      .         .         .              109.1        ?
H13A      C13       H13B      .         .         .              107.8        ?
C13       C14       C15       .         .         .         114.54(17)        Y
C13       C14       H14A      .         .         .              108.6        ?
C15       C14       H14A      .         .         .              108.6        ?
C13       C14       H14B      .         .         .              108.6        ?
C15       C14       H14B      .         .         .              108.6        ?
H14A      C14       H14B      .         .         .              107.6        ?
C16       C15       C14       .         .         .           114.5(2)        Y
C16       C15       H15A      .         .         .              108.6        ?
C14       C15       H15A      .         .         .              108.6        ?
C16       C15       H15B      .         .         .              108.6        ?
C14       C15       H15B      .         .         .              108.6        ?
H15A      C15       H15B      .         .         .              107.6        ?
C15       C16       H16A      .         .         .              109.5        ?
C15       C16       H16B      .         .         .              109.5        ?
H16A      C16       H16B      .         .         .              109.5        ?
C15       C16       H16C      .         .         .              109.5        ?
H16A      C16       H16C      .         .         .              109.5        ?
H16B      C16       H16C      .         .         .              109.5        ?

loop_                                         
        _geom_torsion_atom_site_label_1       
        _geom_torsion_atom_site_label_2       
        _geom_torsion_atom_site_label_3       
        _geom_torsion_atom_site_label_4       
        _geom_torsion_site_symmetry_1         
        _geom_torsion_site_symmetry_2         
        _geom_torsion_site_symmetry_3         
        _geom_torsion_site_symmetry_4         
        _geom_torsion                         
        _geom_torsion_publ_flag               
C6      C1      C2      C3      .       .       .       .           -0.1(3)   Y
C7      C1      C2      C3      .       .       .       .       -179.66(16)   Y
C1      C2      C3      C4      .       .       .       .            0.0(3)   Y
C1      C2      C3      C8      .       .       .       .        179.95(15)   Y
C2      C3      C4      C5      .       .       .       .            0.0(3)   Y
C8      C3      C4      C5      .       .       .       .       -179.85(16)   Y
C3      C4      C5      C6      .       .       .       .           -0.1(3)   Y
C3      C4      C5      C9      .       .       .       .       -179.52(17)   Y
C2      C1      C6      C5      .       .       .       .            0.1(3)   Y
C7      C1      C6      C5      .       .       .       .        179.67(17)   Y
C4      C5      C6      C1      .       .       .       .            0.0(3)   Y
C9      C5      C6      C1      .       .       .       .        179.43(17)   Y
C6      C1      C7      O71     .       .       .       .            0.2(3)   Y
C2      C1      C7      O71     .       .       .       .        179.77(17)   Y
C6      C1      C7      O72     .       .       .       .       -178.88(16)   Y
C2      C1      C7      O72     .       .       .       .            0.6(3)   Y
C4      C3      C8      O81     .       .       .       .       -178.41(18)   Y
C2      C3      C8      O81     .       .       .       .            1.7(3)   Y
C4      C3      C8      O82     .       .       .       .            1.8(3)   Y
C2      C3      C8      O82     .       .       .       .       -178.13(16)   Y
C6      C5      C9      O91     .       .       .       .       -176.98(18)   Y
C4      C5      C9      O91     .       .       .       .            2.5(3)   Y
C6      C5      C9      O92     .       .       .       .            2.7(3)   Y
C4      C5      C9      O92     .       .       .       .       -177.85(17)   Y
O10     C11     C12     C13     .       .       .       .        173.99(18)   Y
C11     C12     C13     C14     .       .       .       .        179.83(19)   Y
C12     C13     C14     C15     .       .       .       .          177.8(2)   Y
C13     C14     C15     C16     .       .       .       .           71.1(3)   Y

loop_                                         
_geom_hbond_atom_site_label_D
_geom_hbond_atom_site_label_H
_geom_hbond_atom_site_label_A
_geom_hbond_distance_DH
_geom_hbond_distance_HA
_geom_hbond_distance_DA
_geom_hbond_angle_DHA
_geom_hbond_site_symmetry_A
O72 H72 O10  0.98(3) 1.59(3) 2.5749(17) 179(3) . 
O82 H82 O71  1.01(3) 1.63(3) 2.6156(17) 162(3) 1_665 
O92 H92 O91  1.04(3) 1.57(3) 2.6123(19) 178(3) 2_575 
O10 H10 O81  0.98(3) 1.83(3) 2.8141(19) 177(3) 1_445 


_diffrn_measured_fraction_theta_max    0.958 
_diffrn_reflns_theta_full              72.58 
_diffrn_measured_fraction_theta_full   0.958 
_refine_diff_density_max    0.254 
_refine_diff_density_min   -0.320 
_refine_diff_density_rms    0.064 
